# Supplementary material for: Performance of Comprehensive Complication Index and Clavien-Dindo Complication Scoring System in Liver Surgery for Hepatocellular Carcinoma
Source: PubMed Central journal article supplement (PMC7767420; doi:10.3390/cancers12123868), 2020-12-21
Supplement: cancers-12-03868-s001.pdf [file cancers-12-03868-s001.pdf]

**Supplementary Material**
**Table S1.** Multivariate linear regression models for LOS (log-transformed) on the derivation set.

| Sample                                                                 | Variables                            | CCI model              | Clavien-Dindo model    |
|------------------------------------------------------------------------|--------------------------------------|------------------------|------------------------|
|                                                                        |                                      | Mean change (95% CI)   | Mean change (95% CI)   |
| Overall sample<br><i>n</i> = 1331                                      | CCI, per 10 unit increase            | 0.267 (0.251;0.282)    | -                      |
|                                                                        | Clavien-Dindo, per category increase | -                      | 0.291 (0.273;0.309)    |
|                                                                        | Surgery major vs minor               | -0.012 (-0.065;0.041)  | 0.006 (-0.048;0.06)    |
|                                                                        | Laparoscopy vs open                  | -0.142 (-0.184;-0.1)   | -0.134 (-0.177;-0.091) |
|                                                                        | Age, per year                        | 0.0001 (-0.002;0.003)  | -0.0001 (-0.003;0.002) |
|                                                                        | ASA score 3-4 vs 1-2                 | 0.027 (-0.018;0.071)   | 0.037 (-0.008;0.083)   |
|                                                                        | Child grade B vs A                   | 0.045 (-0.028;0.118)   | 0.054 (-0.022;0.129)   |
|                                                                        | Duration of surgery >4h vs ≤4h       | 0.103 (0.058;0.147)    | 0.108 (0.063;0.154)    |
|                                                                        | Center volume high vs med or low     | -0.315 (-0.360;-0.270) | -0.353 (-0.399;-0.308) |
| Subgroup of patients with at least two complications<br><i>n</i> = 177 | CCI, per 10 unit increase            | 0.219 (0.176;0.262)    | -                      |
|                                                                        | Clavien-Dindo, per category increase | -                      | 0.223 (0.157;0.289)    |
|                                                                        | Surgery major vs minor               | -0.056 (-0.235;0.124)  | -0.009 (-0.212;0.193)  |
|                                                                        | Laparoscopy vs open                  | -0.168 (-0.319;-0.018) | -0.134 (-0.305;0.036)  |
|                                                                        | Age, per year                        | 0.001 (-0.006;0.009)   | 0.001 (-0.008;0.010)   |
|                                                                        | ASA score 3-4 vs 1-2                 | 0.141 (-0.006;0.289)   | 0.199 (0.034;0.364)    |
|                                                                        | Child grade B vs A                   | 0.250 (-0.039;0.539)   | 0.336 (-0.002;0.674)   |
|                                                                        | Duration of surgery >4h vs ≤4h       | 0.261 (0.115;0.408)    | 0.280 (0.115;0.446)    |
|                                                                        | Center volume high vs med or low     | -0.220 (-0.599;0.159)  | -0.241 (-0.669;0.186)  |

LOS: Length of stay; CCI: Comprehensive Complication Index; CI: Confidence interval.

**Table S2.** Multivariate linear regression models for e-LOS (LOS ≥ 15 days) on the derivation set.

| Sample                                                                 | Variables                            | CCI model           | Clavien-Dindo model  |
|------------------------------------------------------------------------|--------------------------------------|---------------------|----------------------|
|                                                                        |                                      | OR (95% CI)         | OR (95% CI)          |
| Overall sample<br><i>n</i> = 1331                                      | CCI, per 10 unit increase            | 5.507 (4.152;7.304) | -                    |
|                                                                        | Clavien-Dindo, per category increase | -                   | 5.590 (4.201;7.438)  |
|                                                                        | Surgery major vs minor               | 0.810 (0.400;1.641) | 1.014 (0.521;1.973)  |
|                                                                        | Laparoscopy vs open                  | 0.623 (0.344;1.128) | 0.740 (0.413;1.324)  |
|                                                                        | Age, per year                        | 0.990 (0.961;1.021) | 0.991 (0.961;1.022)  |
|                                                                        | ASA score 3-4 vs 1-2                 | 1.712 (0.914;3.208) | 1.978 (1.068;3.662)  |
|                                                                        | Child grade B vs A                   | 0.892 (0.336;2.372) | 1.336 (0.506;3.528)  |
|                                                                        | Duration of surgery >4h vs ≤4h       | 1.669 (0.912;3.053) | 1.769 (0.989;3.162)  |
|                                                                        | Center volume high vs med or low     | 0.650 (0.341;1.241) | 0.267 (0.133;0.533)  |
| Subgroup of patients with at least two complications<br><i>n</i> = 177 | CCI, per 10 unit increase            | 2.793 (1.896;4.115) | -                    |
|                                                                        | Clavien-Dindo, per category increase | -                   | 2.439 (1.666;3.57)   |
|                                                                        | Surgery major vs minor               | 0.779 (0.269;2.256) | 1.021 (0.394;2.645)  |
|                                                                        | Laparoscopy vs open                  | 0.551 (0.227;1.339) | 0.673 (0.294;1.544)  |
|                                                                        | Age, per year                        | 0.976 (0.937;1.016) | 0.98 (0.943;1.018)   |
|                                                                        | ASA score 3-4 vs 1-2                 | 3.093 (1.217;7.861) | 3.336 (1.422;7.822)  |
|                                                                        | Child grade B vs A                   | 2.016 (0.45;9.036)  | 3.469 (0.822;14.634) |
|                                                                        | Duration of surgery >4h vs ≤4h       | 3.417 (1.458;8.007) | 3.179 (1.449;6.975)  |
|                                                                        | Center volume high vs med or low     | 0.316 (0.046;2.197) | 0.312 (0.046;2.124)  |

LOS: Length of stay; CCI: Comprehensive Complication Index; OR: Odds Ratio; CI: Confidence interval.

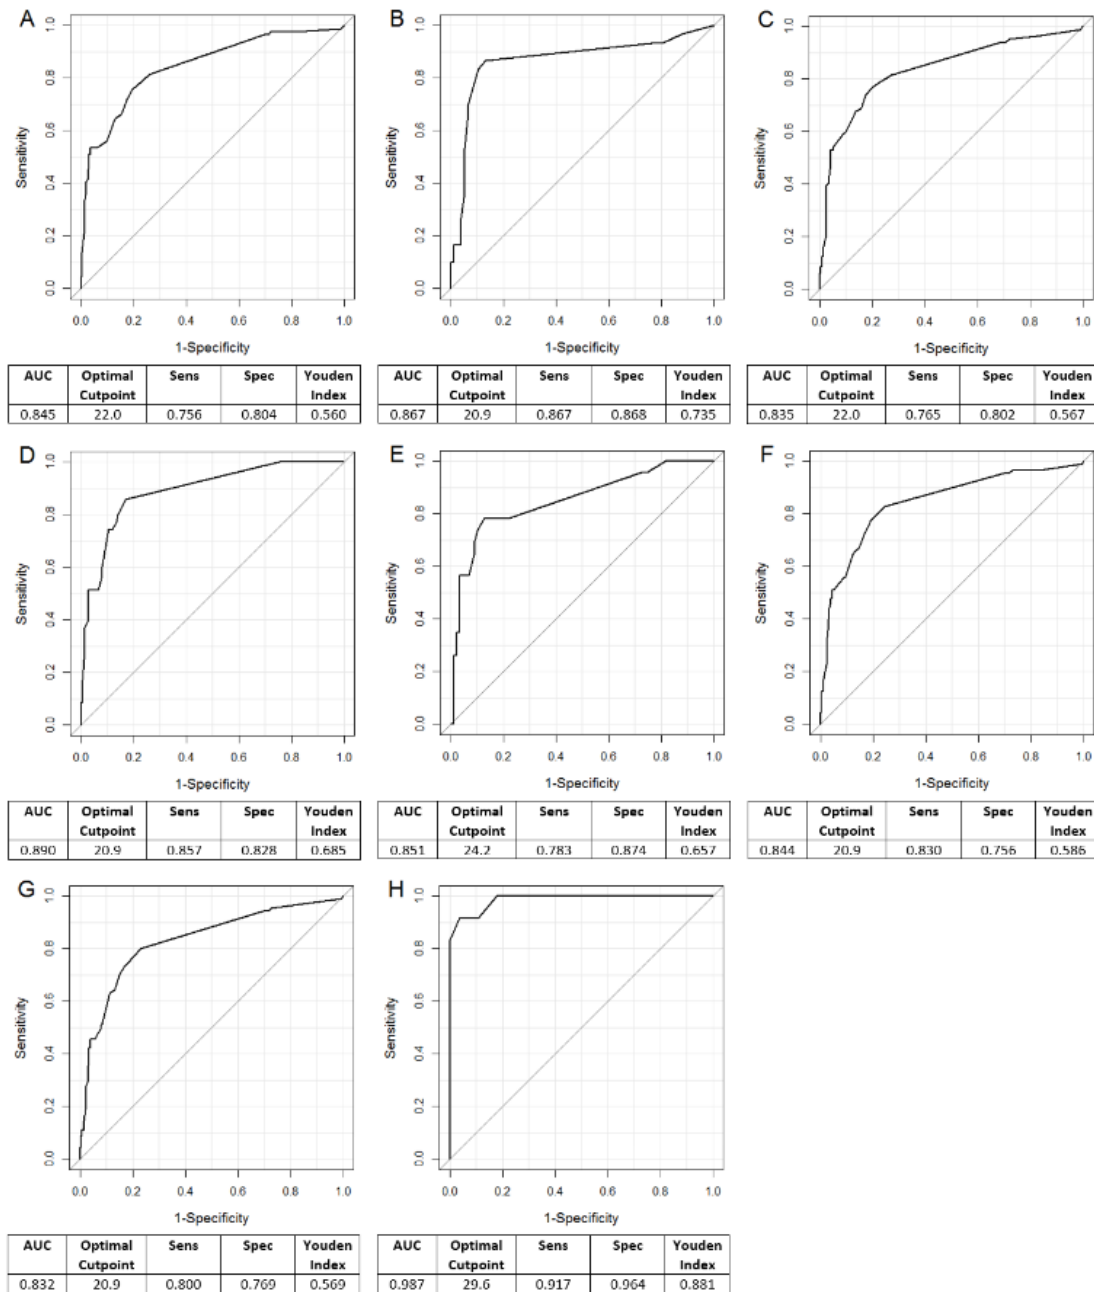

**Figure S1.** ROC curves on subgroups of patients with at least one complication showing the performance of CCI to identify those with e-LOS. The subgroups considered are: (A) minor surgery, (B) major surgery, (C) open surgery, (D) laparoscopy surgery, (E) no cirrhosis, (F) cirrhosis, (G) Child-Pugh grade A, (H) Child-Pugh grade B. The AUC values and the optimal cut-point identified by the Youden Index with the corresponding sensitivity, specificity, positive and negative predictive values are also reported.
